# Supplementary material for: Value of a UK medical degree for international students (VISION): a cross-sectional study
Source: HighWire-hosted journal article supplement (doi:10.1136/bmjopen-2022-065062), 2023-07-01
Supplement: bmjopen-2022-065062supp002_data_supplement.pdf [file bmjopen-2022-065062supp002_data_supplement.pdf]

## Supplementary Appendix

### Supplementary Table 1

1.  
Participation is completely voluntary. Any responses you provide are anonymous. By filling in this questionnaire you are giving your consent to participate in this study and for use of your anonymised data in future publication(s). Do you give your consent for participation?
2.  
Are/were you a Home or International Student? An international student in this study is defined as : Non-British student (who are in full-time or part-time education); OR A student whose normal residency is not in the United Kingdom and without a settled status; OR A student whose tuition fees status is recognised as international/Overseas/EU by a UK university/institution.
3.  
Age
4.  
Gender
5.  
Nationality
6.  
Are you a pre-medical (applying to medical school within the next 2 years), medical or post-graduate (who MUST have completed a UK medical degree within the five-year preceding this study) doctor?
7.  
Did/Do you study in the UK prior to applying/starting medical school?
8.  
For how many years did you study in the UK, prior to medical school?
9.  
To what extent did the following influence your decision of studying medicine in the UK
10.  
Do you have any other reason(s) for coming to the UK to study medicine?
11.  
What is/will be your fee status? \*Home fees are defined as £0-£10.5K per academic year.
12.  
On average, how much do you think an international student has paid in total tuition fees (£) upon completion of a medical degree in the UK?
13.  
On average, what do you think is the total cost (£) to train a medical student to become a doctor in the UK?
14.  
To what extent do you agree with this statement:
15.  
To what extent has the following affected your perception of the value of a UK medical degree
16.  
Were you aware of the ACT LEVY prior to this questionnaire?
- 17.

The ACT Levy is a fee of £10,000 per year, in addition to those normally paid by international medical students. It is intended to cover the cost of clinical education delivered in hospitals. This fee has already been implemented in Scottish medical schools and some English medical schools. There is some possibility that this will be introduced in all UK medical schools.

18.

Do you have any other comments regarding the ACT LEVY or international student fees?

19.

Do you have any other concerns about studying medicine in the UK?

20.

Do you hope to work in the NHS upon graduation?

21.

How long do you want to work in the NHS upon graduation from UK medical school

22.

Do you have any other comments ?

23.

Did you study in the UK prior to applying/starting medical school?

24.

For how many years did you study in the UK, prior to medical school?

25.

Medical School (Currently in/Graduated from in the past 5 years)

26.

To what extent did the following influence your decision of studying medicine in the UK

27.

Do you have any other reason(s) for coming to the UK to study medicine?

28.

What is/was your fee status? \*Home fee defined as £0-£10.5K per academic year

29.

On average, how much do you think an international student has paid in total tuition fees (£) upon completion of a medical degree in the UK?

30.

On average, what do you think is the total cost (£) to train a medical student to become a doctor in the UK?

31.

To what extent do you agree with this statement:

32.

To what extent has the following affected your perception of the value of a UK medical degree

33.

Were you aware of the ACT LEVY prior to this questionnaire?

34.

The ACT Levy is a fee of £10,000 per year, in addition to those normally paid by international medical students. It is intended to cover the cost of clinical education delivered in hospitals. This fee has already been implemented in Scottish medical schools and some English medical schools. There is some possibility that this will be introduced in all UK medical schools.

35.

Do you have any other comments regarding the ACT LEVY or international student fees?

36.

To what extent do you agree with this statement: As an international student I have adapted well to the UK and I have been well supported through either my medical school, university student societies and other methods of support.

37.

Do you have any other concerns about studying medicine in the UK?

38.

Do you hope to work in the NHS upon graduation?

39.

How long do you want to work in the NHS upon graduation from UK medical school

40.

Do you have any other comments ?
